# Supplementary material for: Effects of Spiro-Cyclohexane Substitution of Nitroxyl Biradicals on Dynamic Nuclear Polarization
Source: MDPI journal article supplement (doi:10.3390/molecules27103252), 2022-05-19
Supplement: s1 [file s1]

## Supporting Information

### Effects of Spiro-Cyclohexane Substitution of Nitroxyl Biradicals on Dynamic Nuclear Polarization

Nargiz B. Asanbaeva<sup>a</sup>, Larisa Yu. Gurskaya<sup>a</sup>, Yuliya F. Polienko<sup>a</sup>, Tatyana V. Rybalova<sup>a</sup>, Maxim S. Kazantsev<sup>a</sup>, Alexey A. Dmitriev<sup>b</sup>, Nina P. Gritsan<sup>b</sup>, Nadia Haro-Mares<sup>c</sup>, Torsten Gutmann<sup>c</sup>, Gerd Buntkowsky<sup>c</sup>, Evgeny V. Tretyakov<sup>d</sup>, Elena G. Bagryanskaya<sup>a\*</sup>

<sup>a</sup>*N.N. Vorozhtsov Institute of Organic Chemistry, 9 Ac. Lavrentiev Avenue, Novosibirsk 630090, Russian Federation*

<sup>b</sup>*V.V. Voevodsky Institute of Chemical Kinetics and Combustion, Siberian Branch of the Russian Academy of Sciences, 3 Institutskaya Str, 630090 Novosibirsk, Russian Federation*

<sup>c</sup>*TU Darmstadt; Eduard-Zintl-Institute for Inorganic and Physical Chemistry, Alarich-Weiss-Straße 8, 64287 Darmstadt, Germany*

<sup>d</sup>*N.D. Zelinsky Institute of Organic Chemistry, Russian Academy of Sciences, 47 Leninsky prosp., 119991 Moscow, Russian Federation*

## X-ray crystallography

XRD data were obtained at room temperature on a Bruker Kappa Apex II CCD diffractometer with Mo K $\alpha$  radiation ( $\lambda = 0.71073$  Å) and a graphite monochromator. Absorption corrections were applied empirically using *SADABS* programs [1]. The structures were solved by direct methods using the *SHELX-97* [2] programs set and refined by full-matrix least-squares method against all  $F^2$  in anisotropic (beside the atoms H) approximation using the *SHELXL2014/7* programs set [3]. The H atoms positions were calculated with the riding model. The asymmetric unit contains also molecule of chloroform. The obtained crystal structure geometry and short contacts between non-bonded atoms were analyzed using the *PLATON* program [4].

Crystal solvate of diradical **4** is triclinic, space group P-1,  $a$  12.4262(5),  $b$  13.3902(5),  $c$  13.7759(6) Å,  $\alpha$  67.121(2),  $\beta$  67.676(2),  $\gamma$  77.066(2)°,  $V$  1945.7(1) Å<sup>3</sup>,  $Z$  2, C<sub>41</sub>H<sub>51</sub>C<sub>13</sub>N<sub>6</sub>O<sub>2</sub>Fe,  $D_c$  1.333 g/cm<sup>3</sup>,  $\mu$  0.638 mm<sup>-1</sup>,  $F(000)$  864, crystal size 0.20  $\times$  0.06  $\times$  0.05 mm<sup>3</sup>, independent reflections 8868,  $R$  0.0973,  $R_2$  0.2002 for,  $S$  1.028 for all reflections ( $R$  0.0657,  $wR_2$  0.1767 for 6296  $I > 2\sigma$ ), largest difference peak and hole 1.769 and -1.412 e.Å<sup>-3</sup>.

CCDC 2168987 contains the supplementary crystallographic data for this paper. These data can be obtained free of charge *via* <http://www.ccdc.cam.ac.uk/cgi-bin/catreq.cgi>, or from the Cambridge Crystallographic Data Centre, 12 Union Road, Cambridge CB2 1EZ, UK; fax: (+44) 1223 336 033; or e-mail: [deposit@ccdc.cam.ac.uk](mailto:deposit@ccdc.cam.ac.uk)

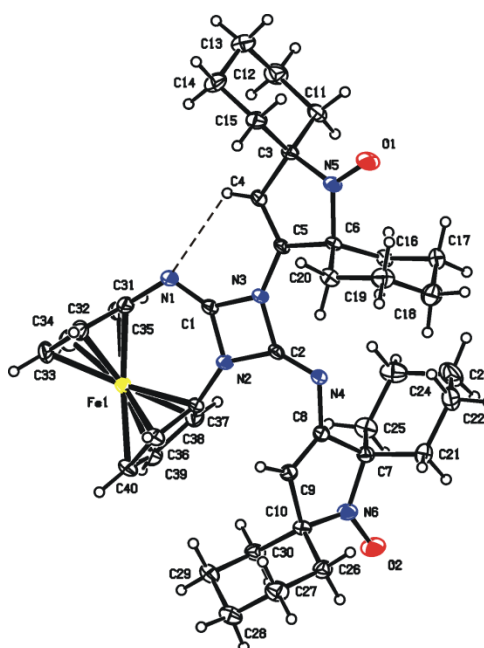

**Figure S1.** Molecular structure of diradical **4** with the atom-labelling scheme. Displacement ellipsoids are drawn at the 30% probability level.

Intermolecular short contact Cl3...O2 equaling to 3.067(3) Å is observed in solvate of **4** (sum of VDW radii [5] is 3.34 Å) (Figure S2). Solvates are bound through H-bond C1S-H...N1 (Table 3) between chloroform and 2,4-diimino-1,3-diazetidino moiety into chains directed along the (*b*-*c*). The chains, in turn, are formally bound *via* C40-H...O1 h-bond in (*b*, *c*) plain and then *via* C32-H...O1 and C38-H...O2 h-bonds along axis *a* into 3D-structure.

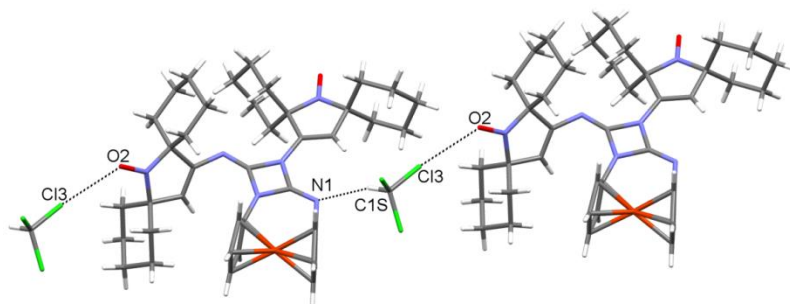

**Figure S2.** Fragment of molecular chain directed along (*b*-*c*).

**Table S1.** Intermolecular hydrogen bonds in crystals of diradical **4** solvate.

|            | H...O, Å | C...O, Å | C-H...O, ° |
|------------|----------|----------|------------|
| C1S-H...N1 | 2.59     | 3.536(6) | 161        |
| C32-H...O1 | 2.59     | 3.485(6) | 163        |
| C40-H...O1 | 2.51     | 3.274(5) | 140        |
| C38-H...O2 | 2.61     | 3.403(5) | 144        |

## References

- Sheldrick, G.M. *SADABS, Program for Empirical Absorption Correction of Area Detector Data*; 1996;
- Sheldrick, G.M. A Short History of {SHELX}. *Acta Crystallogr. Sect. A* **2008**, *64*, 112–122, doi:10.1107/S0108767307043930.
- Sheldrick, G.M. Crystal Structure Refinement with SHELXL. *Acta Crystallogr. Sect. C Struct. Chem.* **2015**, *71*, 3–8, doi:10.1107/S2053229614024218.
- Spek, A. Structure Validation in Chemical Crystallography. *Acta Crystallogr. D. Biol. Crystallogr.* **2009**, *65*, 148–155, doi:10.1107/S090744490804362X.
- Rowland, R.S.; Taylor, R. Intermolecular Nonbonded Contact Distances in Organic Crystal Structures: Comparison with Distances Expected from van Der Waals Radii. *J. Phys. Chem.* **1996**, *100*, 7384–7391, doi:10.1021/jp953141+.
